# Supplementary material for: Phylogenetic analyses suggest multiple changes of substrate specificity within the Glycosyl hydrolase 20 family
Source: PubMed Central journal article supplement (PMC2492878; doi:10.1186/1471-2148-8-214), 2008-07-22
Supplement: 1471-2148-8-214-S5.pdf [file 1471-2148-8-214-S5.pdf]

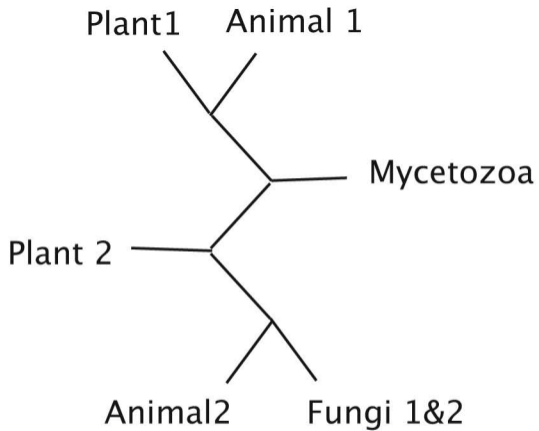

$\Delta \ln L = 18.08$  pSH = 0.3400

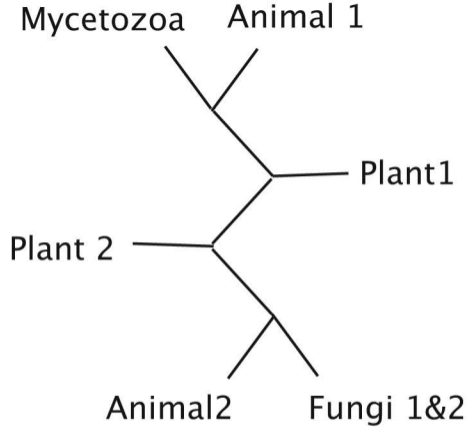

$\ln L = -19569.14$ , pSH = 0.405
